# Supplementary material
Source: publisher figshare collection journal article supplement (https://frontiersin.figshare.com/ndownloader/files/35226073)
Supplement: Supplementary file [file 35226073]

## Table 2 Summary of findings

### IV paracetamol compared to placebo for lumbar disc surgery

**Patient or population:** patients undergoing lumbar disc surgery

**Settings:** Systematic review and meta-analysis

**Intervention:** IV paracetamol

**Comparison:** Placebo

| Outcomes                                                                                                      | Illustrative comparative risks* (95% CI) |                                                         | Relative effect No of Participants Quality of the evidence |                    |                                        | Comments                                                                                |
|---------------------------------------------------------------------------------------------------------------|------------------------------------------|---------------------------------------------------------|------------------------------------------------------------|--------------------|----------------------------------------|-----------------------------------------------------------------------------------------|
|                                                                                                               | Risk with control                        | Risk with Paracetamol                                   | (95% CI)                                                   | (studies)          | (GRADE)                                |                                                                                         |
| <b>Morphine consumption at 24 h postoperatively</b><br>assessed with: morphine (mg)<br>Follow-up: mean 1 days |                                          | <b>MD 10.61 mg lower</b><br>(16.00 lower to 5.22 lower) | -                                                          | 271<br>(5 RCTs)    | ⊕ ⊕ ⊕ ⊖<br><b>moderate<sup>a</sup></b> | IV paracetamol reduces morphine consumption at 24 h postoperatively.                    |
| <b>Postoperative pain scores at 1 h</b><br>assessed with: score scale from 0 to 10<br>Follow-up: mean 1 days  |                                          | <b>MD 2.37 lower</b><br>(3.81 lower to 0.94 lower)      | -                                                          | 142<br>(2 studies) | ⊕ ⊕ ⊖ ⊖<br><b>moderate<sup>a</sup></b> | IV paracetamol results in significant decrease in pain scores at 1 h postoperatively.   |
| <b>Postoperative pain scores at 2 h</b><br>assessed with: score scale from 0 to 10<br>Follow-up: mean 1 days  |                                          | <b>MD 3.17 lower</b><br>(3.85 lower to 2.48 lower)      | -                                                          | 90<br>(1 study)    | ⊕ ⊕ ⊖ ⊖<br><b>moderate<sup>a</sup></b> | IV paracetamol results in significant decrease in pain scores at 2 h postoperatively.   |
| <b>Postoperative pain scores at 6 h</b><br>assessed with: score scale from 0 to 10<br>Follow-up: mean 1 days  |                                          | <b>MD 1.75 lower</b><br>(3.10 lower to 0.40 lower)      | -                                                          | 142<br>(2 studies) | ⊕ ⊕ ⊖ ⊖<br><b>moderate<sup>a</sup></b> | IV paracetamol results in significant difference in pain scores at 6 h postoperatively. |

|                                                                                                               |                                                            |                                   |                    |                                        |                                                                                        |
|---------------------------------------------------------------------------------------------------------------|------------------------------------------------------------|-----------------------------------|--------------------|----------------------------------------|----------------------------------------------------------------------------------------|
| <b>Postoperative pain scores at 12 h</b><br>assessed with: score scale from 0 to 10<br>Follow-up: mean 1 days | <b>MD 0.96 lower</b><br>(1.77 lower to 0.15 lower)         | -                                 | 142<br>(2 studies) | ⊕ ⊕ ⊕ ⊖<br><b>moderate<sup>b</sup></b> | IV paracetamol results in significant decrease in pain scores at 12 h postoperatively. |
| <b>Postoperative pain scores at 24 h</b><br>assessed with: score scale from 0 to 10<br>Follow-up: mean 1 days | <b>MD 0.97 lower</b><br>(1.67 lower to 0.27 lower)         | -                                 | 142<br>(2 studies) | ⊕ ⊕ ⊖ ⊖<br><b>moderate<sup>a</sup></b> | IV paracetamol results in significant decrease in pain scores at 24 h postoperatively. |
| <b>Postoperative nausea and vomiting (PONV)</b><br>assessed with: incidence<br>Follow-up: mean 1 days         | <b>276 per 1000</b><br><b>249 per 1000</b><br>(157 to 387) | <b>RR 0.90</b><br>(0.57 to 1.40)  | 180<br>(3 studies) | ⊕ ⊕ ⊖ ⊖<br><b>low<sup>a,b</sup></b>    | IV paracetamol may result in no difference in PONV                                     |
| <b>Postoperative urinary retention</b><br>assessed with: incidence<br>Follow-up: mean 1 days                  | <b>0 per 1000</b><br><b>0 per 1000</b><br>(0 to 0)         | <b>RR 3.00</b><br>(0.49 to 18.52) | 150<br>(3 studies) | ⊕ ⊕ ⊕ ⊖<br><b>moderate<sup>a</sup></b> | IV paracetamol may result in no difference in urinary retention                        |

\*The basis for the **assumed risk** (e.g. the median control group risk across studies) is provided in footnotes.

The **corresponding risk** (and its 95% confidence interval) is based on the assumed risk in the comparison group and the **relative effect** of the intervention (and its 95% CI).

**CI**: Confidence interval; **MD**: Mean difference; **RR**: Risk ratio; **RCT**: randomized controlled trial; **IV**: intravenous.

#### GRADE Working Group grades of evidence

**High quality**: Further research is very unlikely to change our confidence in the estimate of effect.

**Moderate quality**: Further research is likely to have an important impact on our confidence in the estimate of effect and may change the estimate.

**Low quality**: Further research is very likely to have an important impact on our confidence in the estimate of effect and is likely to change the estimate.

**Very low quality**: We are very uncertain about the estimate.

---

**Explanations**

- a. risks of bias were existed in results
  - b. results are not completely consistent
-
